# Supplementary material for: Comparative efficacy and safety of first-line tyrosine kinase inhibitors in chronic myeloid leukemia: a systematic review and network meta-analysis
Source: PubMed Central journal article supplement — Transl Cancer Res. 2024 Jul 26;13(7):3783–97. doi: 10.21037/tcr-24-747 (PMC11319984; doi:10.21037/tcr-24-747), 2024-07-26
Supplement: tcr-13-07-3783-supplementary.pdf [file tcr-13-07-3783-supplementary.pdf]

## Appendix 1 Search strategies

### PubMed

| Search | Query                                                                                                                                                                                                                                                                                                                                               |
|--------|-----------------------------------------------------------------------------------------------------------------------------------------------------------------------------------------------------------------------------------------------------------------------------------------------------------------------------------------------------|
| #1     | leukemia, myelogenous, chronic, bcr-abl positive [MeSH]                                                                                                                                                                                                                                                                                             |
| #2     | CML [Title-Abstract] OR "chronic myelocytic leukemia*" [Title-Abstract] OR "chronic myelogenous leukemia*" [Title-Abstract] OR "chronic myeloid leukemia*" [Title-Abstract] OR "ph1 positive myeloid leukemia*" [Title-Abstract] OR "philadelphia positive myeloid leukemia*" [Title-Abstract] OR "chronic granulocytic leukemia*" [Title-Abstract] |
| #3     | #1 OR #2                                                                                                                                                                                                                                                                                                                                            |
| #4     | Imatinib Mesylate [MeSH]                                                                                                                                                                                                                                                                                                                            |
| #5     | Imatinib [Title-Abstract] OR STI571 [Title-Abstract] OR CGP57148 [Title-Abstract] OR Glivec [Title-Abstract] OR Gleevec [Title-Abstract]                                                                                                                                                                                                            |
| #6     | Dasatinib [MeSH]                                                                                                                                                                                                                                                                                                                                    |
| #7     | Dasatinib [Title-Abstract] OR BMS354825 [Title-Abstract] OR SPRYCEL [Title-Abstract]                                                                                                                                                                                                                                                                |
| #8     | nilotinib [Supplementary Concept]                                                                                                                                                                                                                                                                                                                   |
| #9     | nilotinib [Title-Abstract] OR AMN107 [Title-Abstract] OR Tasigna [Title-Abstract]                                                                                                                                                                                                                                                                   |
| #10    | flumatinib [Supplementary Concept]                                                                                                                                                                                                                                                                                                                  |
| #11    | Flumatinib [Title-Abstract] OR HHGV678 [Title-Abstract] OR SPRYCEL [Title-Abstract]                                                                                                                                                                                                                                                                 |
| #12    | bosutinib [Supplementary Concept]                                                                                                                                                                                                                                                                                                                   |
| #13    | bosutinib [Title-Abstract] OR SKI606 [Title-Abstract] OR Bosulif [Title-Abstract]                                                                                                                                                                                                                                                                   |
| #14    | radotinib [Title-Abstract] OR iy5511[Title-Abstract]                                                                                                                                                                                                                                                                                                |
| #15    | #4 OR #5 OR #6 OR #7 OR #8 OR #9 OR #10 OR #11 OR #12 OR #13 OR #14                                                                                                                                                                                                                                                                                 |
| #16    | randomized controlled trial [Publication Type] OR controlled clinical trial [Publication Type] OR random*[Title-Abstract] OR RCT [Title-Abstract]                                                                                                                                                                                                   |
| #17    | Animals [Mesh] NOT Humans [Mesh]                                                                                                                                                                                                                                                                                                                    |
| #18    | #3 AND #15 AND #16 NOT #17                                                                                                                                                                                                                                                                                                                          |

### Cochrane Library

| Search | Query                                                                                                                                                                                                                                                                                                       |
|--------|-------------------------------------------------------------------------------------------------------------------------------------------------------------------------------------------------------------------------------------------------------------------------------------------------------------|
| #1     | MeSH descriptor: [leukemia, myelogenous, chronic, bcr-abl positive] explode all trees                                                                                                                                                                                                                       |
| #2     | (CML):ti, ab, kw OR (chronic myelocytic leukemia*):ti, ab, kw OR (chronic myelogenous leukemia*):ti, ab, kw OR (chronic myeloid leukemia*):ti, ab, kw OR (ph1 positive myeloid leukemia*):ti, ab, kw OR (philadelphia positive myeloid leukemia*):ti, ab, kw OR (chronic granulocytic leukemia*):ti, ab, kw |
| #3     | #1 OR #2                                                                                                                                                                                                                                                                                                    |
| #4     | MeSH descriptor: [Imatinib Mesylate] explode all trees                                                                                                                                                                                                                                                      |
| #5     | (Imatinib):ti, ab, kw OR (STI571):ti, ab, kw OR (CGP57148):ti, ab, kw OR (Glivec):ti, ab, kw OR (Gleevec):ti, ab, kw                                                                                                                                                                                        |
| #6     | MeSH descriptor: [Dasatinib] explode all trees                                                                                                                                                                                                                                                              |
| #7     | (Dasatinib):ti, ab, kw OR (BMS354825):ti, ab, kw OR (SPRYCEL):ti, ab, kw                                                                                                                                                                                                                                    |
| #8     | (nilotinib):ti, ab, kw OR (AMN107):ti, ab, kw OR (Tasigna):ti, ab, kw                                                                                                                                                                                                                                       |
| #9     | (Flumatinib):ti, ab, kw OR (HHGV678):ti, ab, kw                                                                                                                                                                                                                                                             |
| #10    | (Bosutinib):ti, ab, kw OR (SKI606):ti, ab, kw OR (Bosulif):ti, ab, kw                                                                                                                                                                                                                                       |
| #11    | (Radotinib):ti, ab, kw OR (iy5511):ti, ab, kw                                                                                                                                                                                                                                                               |
| #12    | #4 OR #5 OR #6 OR #7 OR #8 OR #9 OR #10 OR #11 OR #12                                                                                                                                                                                                                                                       |
| #13    | (Controlled clinical trial):pt                                                                                                                                                                                                                                                                              |
| #14    | (Randomised controlled trial):pt                                                                                                                                                                                                                                                                            |
| #15    | #13 OR #14                                                                                                                                                                                                                                                                                                  |
| #16    | #3 AND #12 AND #15                                                                                                                                                                                                                                                                                          |

MMR 3

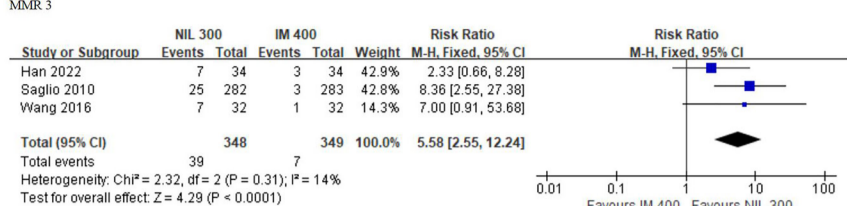

MMR6

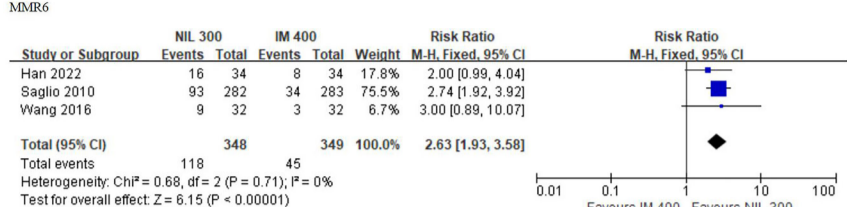

MMR12

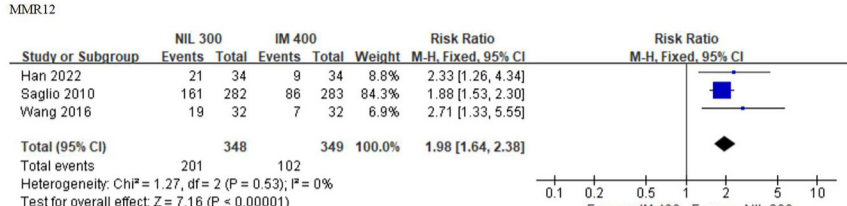

CCyR 3

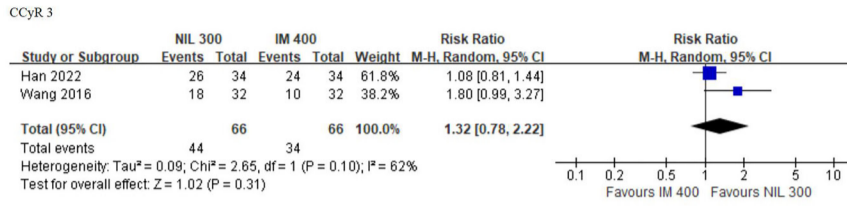

CCyR 6

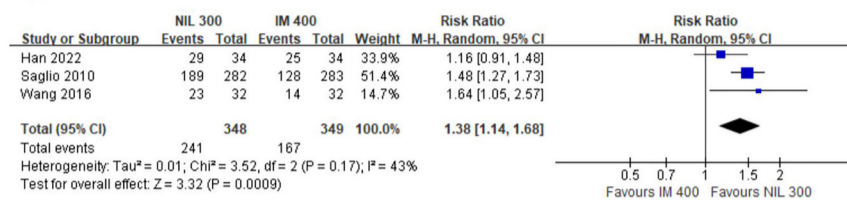

CCyR 12

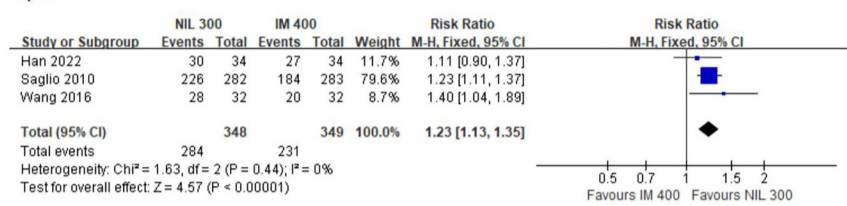

IM 800 vs. IM 400

MMR 3

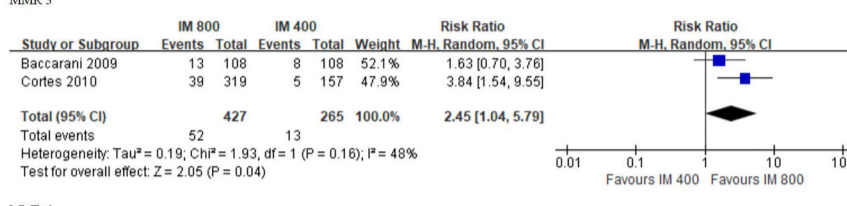

MMR 6

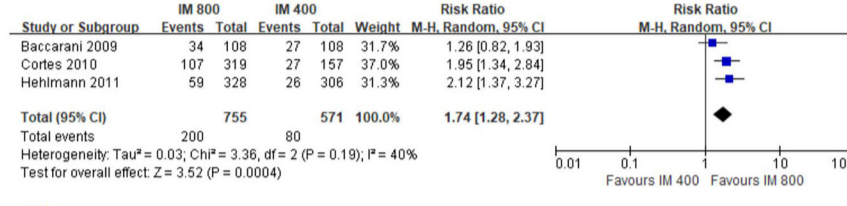

MMR 12

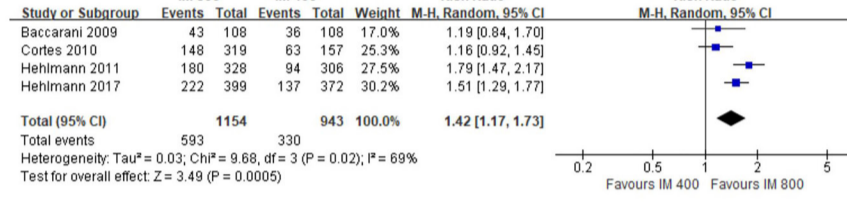

CCyR 3

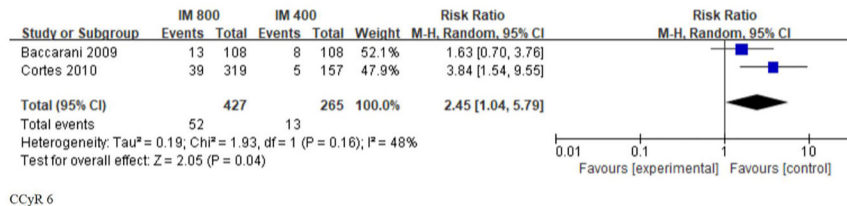

CCyR 6

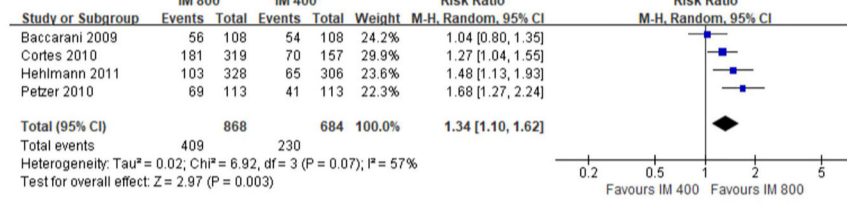

CCyR 12

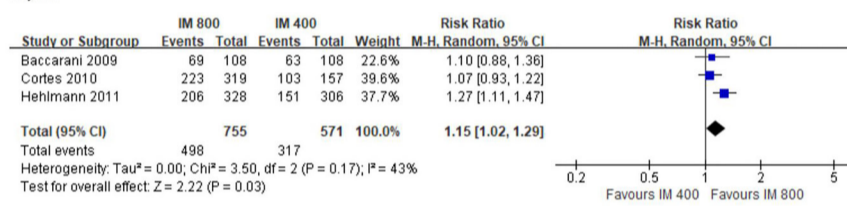

DAS 100 vs. IM 400

MMR 12

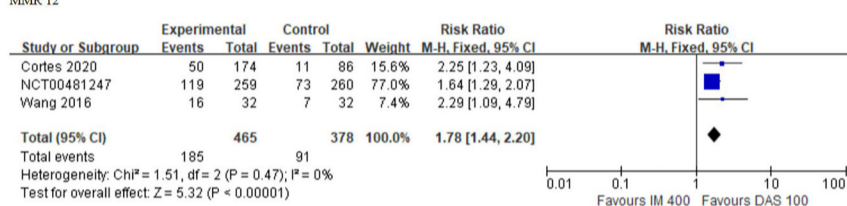

CCyR 6

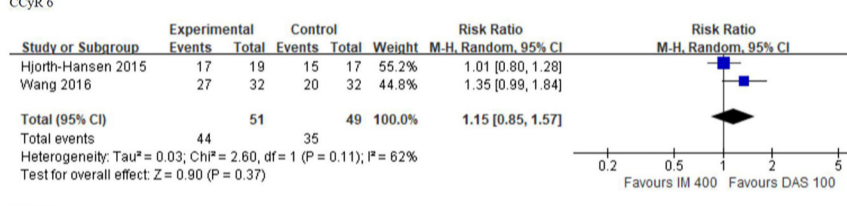

CCyR 12

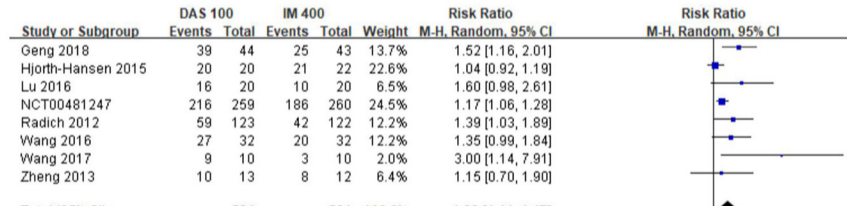

| A                 |                     |                      |                      |                      |                      |                      |                      |                      |                      |                      |                    |                    |
|-------------------|---------------------|----------------------|----------------------|----------------------|----------------------|----------------------|----------------------|----------------------|----------------------|----------------------|--------------------|--------------------|
| IM 400mg QD       | 4.45 (1.05,18.90)   | 4.92 (1.94,12.50)    | 3.11 (0.91,10.60)    | 2.45 (0.61,9.86)     | 2.14 (0.68,6.70)     | 4.10 (0.41,41.28)    | 8.00 (0.88,72.41)    | 2.45 (1.06,5.64)     |                      |                      |                    |                    |
| 0.22 (0.05,0.95)  | <b>DAS 100mg QD</b> | 1.10 (0.33,3.74)     | 0.70 (0.15,3.30)     | 0.55 (0.07,4.09)     | 0.48 (0.08,3.03)     | 0.92 (0.06,14.03)    | 1.80 (0.13,25.03)    | 0.55 (0.10,2.91)     |                      |                      |                    |                    |
| 0.20 (0.08,0.52)  | 0.91 (0.27,3.06)    | <b>NIL 300mg BID</b> | 0.63 (0.23,1.73)     | 0.50 (0.09,2.66)     | 0.44 (0.10,1.90)     | 0.83 (0.07,10.06)    | 1.63 (0.15,17.78)    | 0.50 (0.14,1.74)     |                      |                      |                    |                    |
| 0.32 (0.09,1.09)  | 1.43 (0.30,6.76)    | 1.58 (0.58,4.32)     | <b>NIL 400mg BID</b> | 0.79 (0.12,5.03)     | 0.69 (0.13,3.67)     | 1.32 (0.10,17.99)    | 2.57 (0.21,31.97)    | 0.79 (0.18,3.45)     |                      |                      |                    |                    |
| 0.41 (0.10,1.64)  | 1.82 (0.24,13.53)   | 2.01 (0.38,10.74)    | 1.27 (0.20,8.12)     | <b>BOS 400mg QD</b>  | 0.87 (0.14,5.29)     | 1.67 (0.11,24.83)    | 3.27 (0.24,44.24)    | 1.00 (0.20,5.07)     |                      |                      |                    |                    |
| 0.47 (0.15,1.46)  | 2.08 (0.33,13.11)   | 2.30 (0.53,10.03)    | 1.45 (0.27,7.75)     | 1.14 (0.19,6.92)     | <b>BOS 500mg QD</b>  | 1.91 (0.15,25.15)    | 3.73 (0.31,44.63)    | 1.14 (0.28,4.70)     |                      |                      |                    |                    |
| 0.24 (0.02,2.45)  | 1.09 (0.07,16.55)   | 1.20 (0.10,14.47)    | 0.76 (0.06,10.36)    | 0.60 (0.04,8.85)     | 0.52 (0.04,6.86)     | <b>RAD 300mg BID</b> | 1.95 (0.48,7.94)     | 0.60 (0.05,6.96)     |                      |                      |                    |                    |
| 0.12 (0.01,1.13)  | 0.56 (0.04,7.76)    | 0.62 (0.06,6.73)     | 0.39 (0.03,4.84)     | 0.31 (0.02,4.15)     | 0.27 (0.02,3.20)     | 0.51 (0.13,2.09)     | <b>RAD 400mg BID</b> | 0.31 (0.03,3.23)     |                      |                      |                    |                    |
| 0.41 (0.18,0.94)  | 1.82 (0.34,9.63)    | 2.01 (0.57,7.02)     | 1.27 (0.29,5.56)     | 1.00 (0.20,5.07)     | 0.87 (0.21,3.59)     | 1.67 (0.14,19.50)    | 3.27 (0.31,34.44)    | <b>IM 800mg QD</b>   |                      |                      |                    |                    |
| B                 |                     |                      |                      |                      |                      |                      |                      |                      |                      |                      |                    |                    |
| IM 400mg QD       | 1.19 (0.91,1.56)    | 1.33 (1.08,1.64)     | 1.31 (0.98,1.75)     | 1.25 (0.60,2.58)     | 1.43 (1.03,1.98)     | 1.20 (0.76,1.90)     | /                    | 1.22 (0.89,1.68)     | 1.27 (0.89,1.80)     | 1.17 (0.81,1.68)     | 1.33 (1.11,1.61)   | 1.37 (0.92,2.04)   |
| 0.24 (0.12,0.49)  | <b>DAS 100mg QD</b> | 1.12 (0.83,1.51)     | 1.10 (0.76,1.60)     | 1.05 (0.48,2.29)     | 1.20 (0.79,1.85)     | 1.01 (0.70,1.46)     | /                    | 1.03 (0.68,1.56)     | 1.06 (0.68,1.66)     | 0.98 (0.63,1.55)     | 1.12 (0.81,1.56)   | 1.15 (0.71,1.87)   |
| 0.39 (0.27,0.55)  | 1.61 (0.83,3.13)    | <b>NIL 300mg BID</b> | 0.99 (0.75,1.30)     | 0.94 (0.44,2.00)     | 1.08 (0.73,1.58)     | 0.90 (0.56,1.45)     | /                    | 0.92 (0.63,1.34)     | 0.95 (0.63,1.44)     | 0.88 (0.58,1.34)     | 1.00 (0.76,1.33)   | 1.03 (0.66,1.62)   |
| 0.42 (0.28,0.62)  | 1.74 (0.84,3.60)    | 1.08 (0.78,1.49)     | <b>NIL 400mg BID</b> | 0.95 (0.43,2.08)     | 1.09 (0.71,1.69)     | 0.91 (0.54,1.55)     | /                    | 0.93 (0.61,1.43)     | 0.96 (0.61,1.52)     | 0.89 (0.56,1.42)     | 1.02 (0.72,1.43)   | 1.05 (0.64,1.71)   |
| \                 | \                   | \                    | \                    | <b>FLT3 400mg QD</b> | 1.15 (0.57,2.33)     | 0.96 (0.41,2.28)     | /                    | 0.98 (0.44,2.17)     | 1.01 (0.45,2.28)     | 0.94 (0.42,2.12)     | 1.07 (0.50,2.27)   | 1.10 (0.48,2.52)   |
| 0.54 (0.36,0.82)  | 2.25 (0.98,5.14)    | 1.40 (0.81,2.41)     | 1.29 (0.73,2.28)     | \                    | <b>FLT3 600mg QD</b> | 0.84 (0.48,1.48)     | /                    | 0.85 (0.54,1.35)     | 0.88 (0.55,1.43)     | 0.82 (0.50,1.33)     | 0.93 (0.64,1.36)   | 0.96 (0.57,1.60)   |
| 0.23 (0.09,0.60)  | 0.95 (0.50,1.81)    | 0.59 (0.24,1.49)     | 0.55 (0.21,1.44)     | \                    | 0.42 (0.15,1.21)     | <b>DAS 70mg QD</b>   | /                    | 1.02 (0.58,1.79)     | 1.06 (0.59,1.89)     | 0.98 (0.54,1.75)     | 1.11 (0.68,1.83)   | 1.14 (0.62,2.10)   |
| 0.52 (0.36,0.77)  | 2.16 (0.96,4.87)    | 1.34 (0.80,2.26)     | 1.24 (0.72,2.15)     | \                    | 0.96 (0.55,1.69)     | 2.26 (0.81,6.35)     | <b>BOS 400mg QD</b>  | /                    | /                    | /                    | /                  | /                  |
| 0.41 (0.26,0.65)  | 1.69 (0.72,3.95)    | 1.05 (0.59,1.88)     | 0.97 (0.53,1.77)     | \                    | 0.75 (0.41,1.40)     | 1.77 (0.61,5.12)     | 0.78 (0.43,1.42)     | <b>BOS 500mg QD</b>  | 1.03 (0.64,1.67)     | 0.96 (0.59,1.55)     | 1.09 (0.76,1.58)   | 1.12 (0.67,1.87)   |
| 0.43 (0.22,0.84)  | 1.78 (0.67,4.74)    | 1.11 (0.52,2.36)     | 1.02 (0.47,2.22)     | \                    | 0.79 (0.36,1.74)     | 1.86 (0.58,6.00)     | 0.82 (0.38,1.78)     | 1.05 (0.47,2.37)     | <b>RAD 300mg BID</b> | 0.92 (0.66,1.30)     | 1.05 (0.71,1.57)   | 1.08 (0.64,1.85)   |
| 0.61 (0.30,1.25)  | 2.53 (0.92,6.97)    | 1.57 (0.71,3.50)     | 1.45 (0.64,3.29)     | \                    | 1.13 (0.49,2.58)     | 2.65 (0.80,8.77)     | 1.17 (0.52,2.64)     | 1.50 (0.64,3.50)     | 1.42 (0.81,2.50)     | <b>RAD 400mg BID</b> | 1.14 (0.76,1.71)   | 1.17 (0.68,2.01)   |
| 0.57 (0.44,0.75)  | 2.37 (1.11,5.09)    | 1.48 (0.95,2.30)     | 1.36 (0.85,2.19)     | \                    | 1.06 (0.64,1.73)     | 2.49 (0.92,6.72)     | 1.10 (0.69,1.75)     | 1.40 (0.82,2.39)     | 1.34 (0.65,2.76)     | 0.94 (0.44,2.02)     | <b>IM 800mg QD</b> | 1.03 (0.66,1.59)   |
| \                 | \                   | \                    | \                    | \                    | \                    | \                    | \                    | \                    | \                    | \                    | \                  | <b>IM 600mg QD</b> |
| C                 |                     |                      |                      |                      |                      |                      |                      |                      |                      |                      |                    |                    |
| IM 400mg QD       | 0.99 (0.76,1.29)    | 0.59 (0.40,0.88)     | 0.49 (0.32,0.75)     | 0.70 (0.47,1.04)     | 0.56 (0.32,0.97)     | 0.46 (0.30,0.69)     | 0.64 (0.36,1.13)     | 0.79 (0.47,1.33)     | 1.53 (1.06,2.20)     |                      |                    |                    |
| 0.62 (0.39,0.97)  | <b>DAS 100mg QD</b> | 0.60 (0.37,0.96)     | 0.49 (0.30,0.82)     | 0.71 (0.44,1.14)     | 0.56 (0.31,1.04)     | 0.46 (0.28,0.76)     | 0.65 (0.35,1.21)     | 0.80 (0.45,1.43)     | 1.54 (0.98,2.42)     |                      |                    |                    |
| 0.85 (0.49,1.49)  | 1.39 (0.68,2.84)    | <b>NIL 300mg BID</b> | 0.82 (0.51,1.33)     | 1.19 (0.68,2.07)     | 0.94 (0.48,1.86)     | 0.77 (0.43,1.37)     | 1.08 (0.54,2.16)     | 1.34 (0.70,2.57)     | 2.58 (1.51,4.42)     |                      |                    |                    |
| 0.72 (0.42,1.23)  | 1.17 (0.58,2.35)    | 0.84 (0.50,1.41)     | <b>NIL 400mg BID</b> | 1.44 (0.81,2.57)     | 1.14 (0.57,2.29)     | 0.93 (0.51,1.70)     | 1.31 (0.65,2.67)     | 1.62 (0.83,3.18)     | 3.13 (1.78,5.49)     |                      |                    |                    |
| 0.97 (0.65,1.45)  | 1.57 (0.86,2.89)    | 1.13 (0.57,2.25)     | 1.35 (0.69,2.63)     | <b>FLT3 600mg QD</b> | 0.79 (0.40,1.56)     | 0.65 (0.37,1.15)     | 0.91 (0.46,1.82)     | 1.13 (0.59,2.16)     | 2.18 (1.28,3.71)     |                      |                    |                    |
| 0.41 (0.22,0.75)  | 0.67 (0.31,1.42)    | 0.48 (0.21,1.09)     | 0.57 (0.25,1.28)     | 0.42 (0.20,0.88)     | <b>BOS 400mg QD</b>  | 0.82 (0.41,1.64)     | 1.15 (0.52,2.54)     | 1.42 (0.67,3.03)     | 2.74 (1.42,5.32)     |                      |                    |                    |
| 1.02 (0.63,1.63)  | 1.65 (0.86,3.17)    | 1.19 (0.57,2.47)     | 1.41 (0.69,2.88)     | 1.05 (0.56,1.95)     | 2.48 (1.15,5.35)     | <b>BOS 500mg QD</b>  | 1.41 (0.70,2.84)     | 1.74 (0.89,3.38)     | 3.35 (1.92,5.84)     |                      |                    |                    |
| 1.20 (0.60,2.40)  | 1.95 (0.85,4.45)    | 1.41 (0.58,3.41)     | 1.67 (0.70,4.00)     | 1.24 (0.56,2.76)     | 2.93 (1.17,7.34)     | <b>RAD 300mg BID</b> | 1.24 (0.68,2.26)     | 2.38 (1.21,4.67)     | 2.38 (1.21,4.67)     |                      |                    |                    |
| 1.45 (0.70,3.02)  | 2.36 (1.00,5.57)    | 1.70 (0.68,4.26)     | 2.02 (0.82,5.00)     | 1.50 (0.65,3.46)     | 3.55 (1.37,9.17)     | 1.43 (0.60,3.41)     | 1.21 (0.56,2.61)     | <b>RAD 400mg BID</b> | 1.93 (1.02,3.63)     |                      |                    |                    |
| 0.57 (0.35,0.93)  | 0.92 (0.47,1.81)    | 0.67 (0.32,1.40)     | 0.79 (0.38,1.64)     | 0.59 (0.31,1.11)     | 1.39 (0.63,3.03)     | 0.56 (0.28,1.11)     | 0.47 (0.20,1.11)     | 0.39 (0.16,0.94)     | <b>IM 800mg QD</b>   |                      |                    |                    |
| D                 |                     |                      |                      |                      |                      |                      |                      |                      |                      |                      |                    |                    |
| IM 400mg QD       | /                   | 2.22 (1.54,3.20)     | 3.10 (2.15,4.46)     | 1.77 (0.99,3.17)     | 4.53 (3.05,6.73)     | /                    | /                    | 3.49 (2.40,5.07)     | 7.82 (3.82,16.04)    | 13.26 (6.26,28.08)   |                    |                    |
| 7.07 (1.20,41.60) | <b>DAS 100mg QD</b> | /                    | /                    | /                    | /                    | /                    | /                    | /                    | /                    | /                    |                    |                    |
| 0.13 (0.09,0.19)  | 0.02 (0.00,0.11)    | <b>NIL 300mg BID</b> | 1.40 (1.00,1.96)     | 0.80 (0.40,1.59)     | 2.04 (1.19,3.50)     | /                    | /                    | 1.57 (0.93,2.66)     | 3.53 (1.58,7.90)     | 5.98 (2.59,13.78)    |                    |                    |
| 0.09 (0.06,0.14)  | 0.01 (0.00,0.08)    | 0.71 (0.49,1.02)     | <b>NIL 400mg BID</b> | 0.57 (0.29,1.14)     | 1.46 (0.85,2.50)     | /                    | /                    | 1.13 (0.67,1.90)     | 2.52 (1.13,5.65)     | 4.28 (1.86,9.85)     |                    |                    |
| 0.53 (0.32,0.87)  | 0.07 (0.01,0.47)    | 4.00 (2.13,7.50)     | 5.66 (3.00,10.70)    | <b>FLT3 600mg QD</b> | 2.56 (1.26,5.19)     | /                    | /                    | 1.97 (0.99,3.95)     | 4.42 (1.75,11.16)    | 7.49 (2.89,19.40)    |                    |                    |
| 0.89 (0.03,28.42) | 0.13 (0.01,2.47)    | 6.74 (0.21,219.93)   | 9.55 (0.29,311.92)   | 1.69 (0.05,55.81)    | <b>DAS 70mg QD</b>   | /                    | /                    | /                    | /                    | /                    |                    |                    |
| 0.13 (0.09,0.20)  | 0.02 (0.00,0.11)    | 1.00 (0.57,1.74)     | 1.41 (0.80,2.48)     | 0.25 (0.13,0.47)     | 0.15 (0.00,4.83)     | <b>BOS 400mg QD</b>  | /                    | /                    | /                    | /                    |                    |                    |
| 0.19 (0.13,0.28)  | 0.03 (0.00,0.17)    | 1.45 (0.85,2.49)     | 2.06 (1.19,3.56)     | 0.36 (0.19,0.68)     | 0.22 (0.01,7.03)     | 1.46 (0.84,2.55)     | <b>BOS 500mg QD</b>  | 0.77 (0.45,1.33)     | 1.73 (0.76,3.92)     | 2.93 (1.25,6.84)     |                    |                    |
| 0.07 (0.03,0.16)  | 0.01 (0.00,0.07)    | 0.55 (0.24,1.29)     | 0.78 (0.33,1.84)     | 0.14 (0.06,0.34)     | 0.08 (0.00,2.84)     | 0.55 (0.23,1.31)     | 0.38 (0.16,0.89)     | <b>RAD 300mg BID</b> | 2.24 (1.00,5.04)     | 3.80 (1.64,8.79)     |                    |                    |
| 0.06 (0.03,0.13)  | 0.01 (0.00,0.06)    | 0.46 (0.19,1.09)     | 0.65 (0.27,1.55)     | 0.11 (0.05,0.29)     | 0.07 (0.00,2.36)     | 0.46 (0.19,1.10)     | 0.31 (0.13,0.75)     | 0.83 (0.38,1.80)     | <b>RAD 400mg BID</b> | 1.69 (0.85,3.39)     |                    |                    |
| /                 | /                   | /                    | /                    | /                    | /                    | /                    | /                    | /                    | /                    | <b>IM 800mg QD</b>   |                    |                    |

**Figure S2** Pooled estimates of the network meta-analysis. (A) Pooled risk ratio (95% confidence intervals) for MMR 3. (B) Pooled risk ratio (95% confidence intervals) for CCyR 6 (upper triangle) and MMR 6 (lower triangle). (C) Pooled risk ratio (95% confidence intervals) for neutropenia of grade 3 or 4 (upper triangle) and thrombocytopenia of grade 3 or 4 (lower triangle). (D) Pooled risk ratio (95% confidence intervals) for AST elevation of all grade (upper triangle) and ALT elevation of all grade (lower triangle). Data in each cell are risk ratio (95% confidence intervals) for the comparison of column-defining treatment versus row-defining treatment. Results were considered statistically significant if the relative risk value's 95% confidence interval did not include 1.0. IM, imatinib; DAS, dasatinib; NIL, nilotinib; FLU, flumatinib; BOS, bosutinib; RAD, radotinib; MMR, major molecular response; CCyR, complete cytogenetic response; ALT, alanine aminotransferase; AST, aspartate aminotransferase.

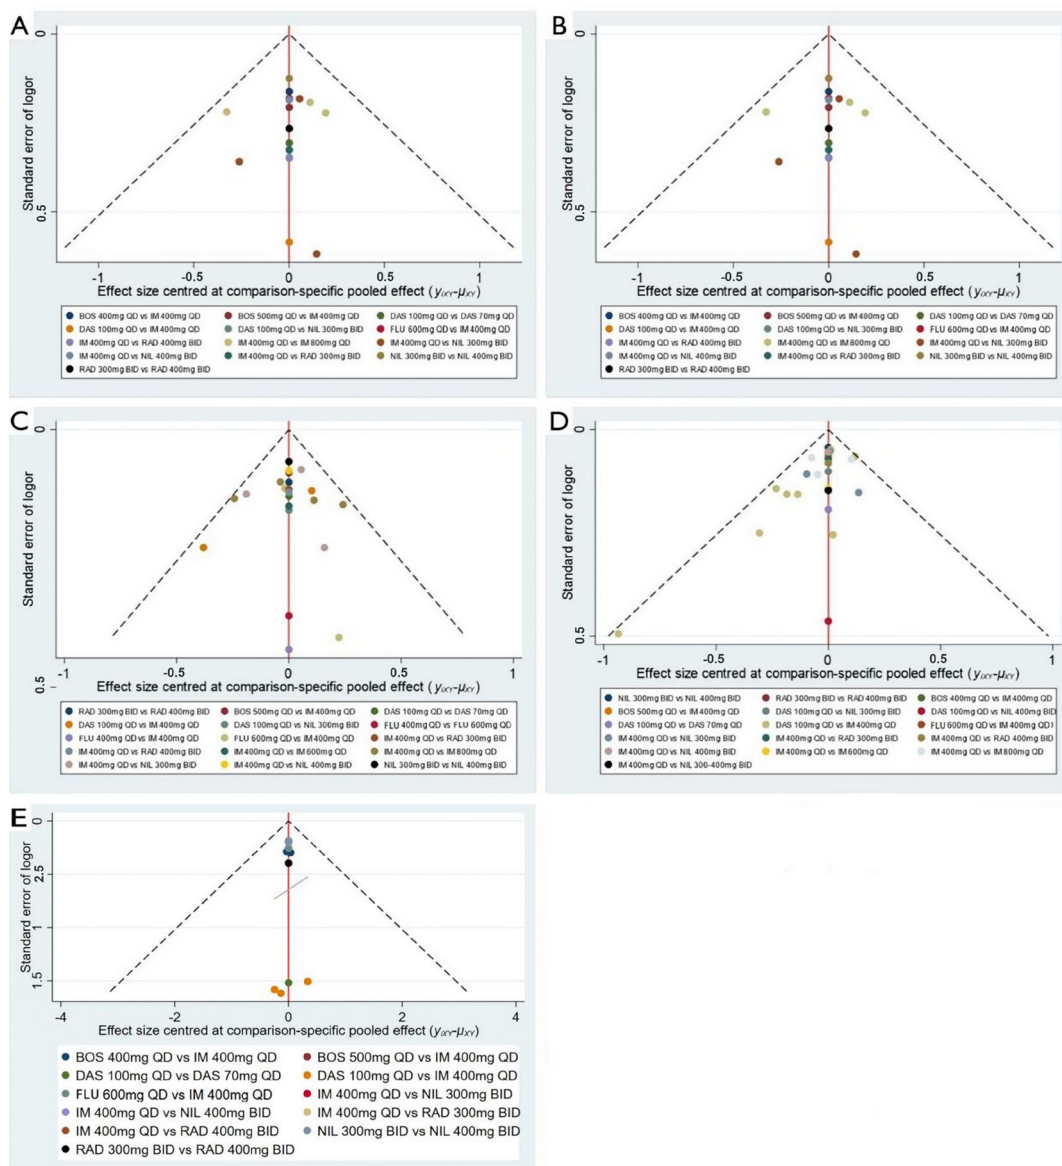

**Figure S3** Funnel plots for publication bias. (A) MMR 6; (B) MMR 12; (C) CCyR 6; (D) CCyR 12; (E) ALT elevation of all grade. IM, imatinib; DAS, dasatinib; NIL, nilotinib; FLU, flumatinib; BOS, bosutinib; RAD, radotinib; MMR, major molecular response; CCyR, complete cytogenic response; ALT, Alanine Aminotransferase; QD, quaque die.
